# Supplementary material for: Dry season aerosol iron solubility in tropical northern Australia
Source: Copernicus journal article supplement (doi:10.5194/acp-2016-419), 2016-06-17
Supplement: Supplementary file 1 [file acp-2016-419-supplement.pdf]

# Supplement for: Dry season aerosol iron solubility in tropical northern Australia

V.H.L. Winton<sup>1,a</sup>, R. Edwards<sup>1</sup>, A.R. Bowie<sup>2,3</sup>, M. Keywood<sup>4</sup>, A.G. Williams<sup>5</sup>, S. Chambers<sup>5</sup>, P.W. Selleck<sup>4</sup>, M. Desservettaz<sup>6</sup>, M. Mallet<sup>7</sup>, C. Paton-Walsh<sup>6</sup>

5 <sup>1</sup>Physics and Astronomy, Curtin University, Perth, Western Australia, Australia

<sup>2</sup>Antarctic Climate and Ecosystems CRC, University of Tasmania, Hobart, Tasmania, Australia

<sup>3</sup>Institute for Marine and Antarctic Studies, University of Tasmania, Hobart, Tasmania, Australia

<sup>4</sup>CSIRO, Ocean and Atmosphere, Aspendale, Victoria

<sup>5</sup>ANSTO, Institute for Environmental Research, Lucas Heights, New South Wales, Australia

10 <sup>6</sup>Centre for Atmospheric Chemistry, University of Wollongong, Wollongong, New South Wales, Australia

<sup>7</sup>Department of Chemistry, Physics and Mechanical Engineering, Queensland University of Technology, Queensland, Brisbane, 4000, Australia

<sup>a</sup>now at: British Antarctic Survey, Cambridge, United Kingdom

*Correspondence to:* V.H.L Winton (vicwin@bas.ac.uk)

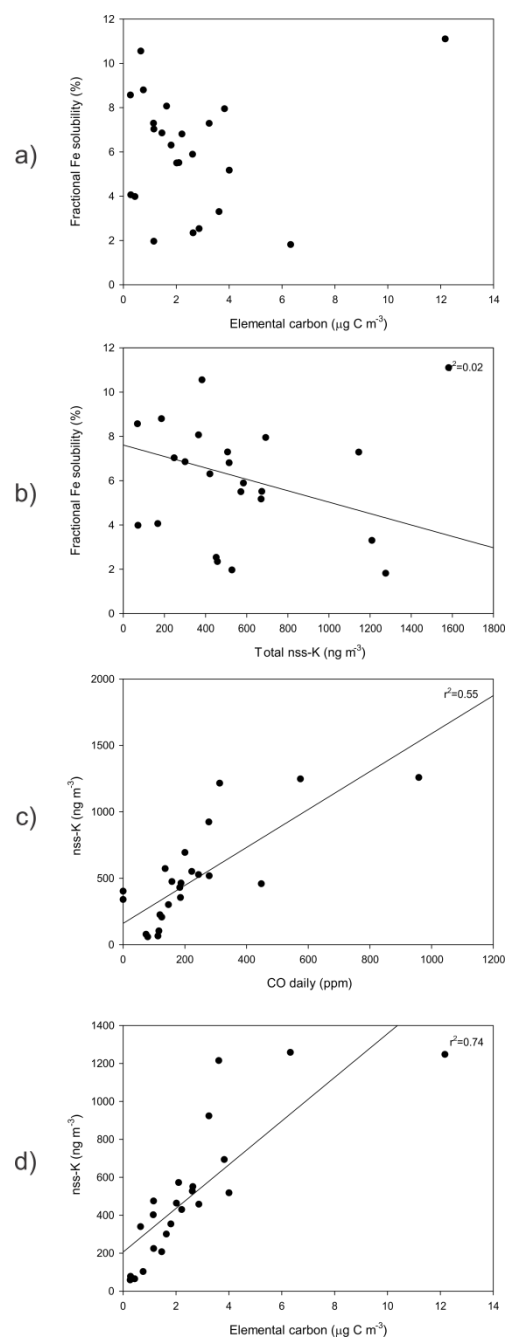

**Figure S1: Scatterplots of a) fractional Fe solubility versus elemental carbon concentrations, b) fractional Fe solubility versus nss-K concentrations, c) nss-K concentrations versus CO concentrations, d) nss-K concentrations versus elemental carbon concentrations.**

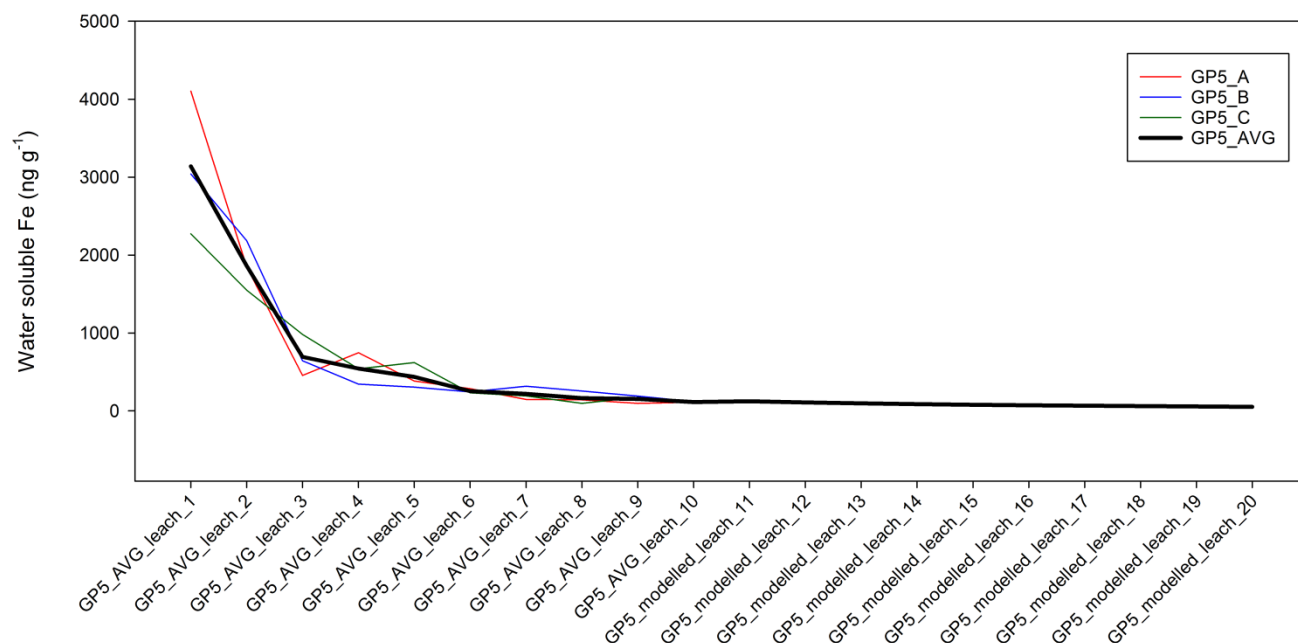

**Figure S2: Sequential ultra-pure water leaches of three aliquots (A-C) of GP5. Each filter punch was leached with 10 passes of 50 mL ultra-pure water. Black lined indicates the mean soluble iron concentration of the three aliquots. Leaches 11-20 were estimated by fitting a power law curve to the average water soluble iron concentrations of the GP5 sample.**

**Table S1: Recovery rates of total trace metals in certified reference materials (CRM).**

| CRM recovery % | Al  | ± | K   | ±  | Ti  | ± | V   | ± | Cr  | ±  | Mn  | ±  | Fe  | ± | As | ±  | Pb  | ±  |
|----------------|-----|---|-----|----|-----|---|-----|---|-----|----|-----|----|-----|---|----|----|-----|----|
| MESS-3         | 112 | 8 | 101 | 15 | 92  | 9 | 100 | 9 | 97  | 10 | 97  | 11 | 108 | 8 | 95 | 11 | 103 | 11 |
| TMF            | n/d |   | n/d |    | n/d |   | 101 | 8 | 102 | 9  | 100 | 9  | 99  | 7 | 91 | 7  | 107 | 8  |

**Table S2: Instrument conditions and measurement parameters.**

|                                                                    |                                                                            |
|--------------------------------------------------------------------|----------------------------------------------------------------------------|
| Instrument                                                         | HR-ICP-MS, Element XR (Thermo Fisher, Germany)                             |
| Torch                                                              | Precision type, quartz o-ring free, PFA injector (Element Scientific Inc.) |
| Spray chamber                                                      | PC <sup>3</sup> chilled cyclonic spray chamber (ESI)                       |
| Nebuliser                                                          | ST micro centric PFA (ESI)                                                 |
| RF power (W)                                                       | ~1350                                                                      |
| Cool gas flow (L min <sup>-1</sup> )                               | ~16                                                                        |
| Auxiliary gas flow (L min <sup>-1</sup> )                          | ~0.9                                                                       |
| Sample gas flow (L min <sup>-1</sup> )                             | ~0.9                                                                       |
| Additional gas (L min <sup>-1</sup> )                              | ~0.4 Ar                                                                    |
| Guard electrode                                                    | Activated                                                                  |
| Sample uptake                                                      | 96 s (Seafast II pump auto-sampler with fast 3 sample injection valve)     |
| Sample rinse                                                       | 50 s, 3 % HCl (ultra-pure)                                                 |
| Pump speed during wash                                             | 10 rpm                                                                     |
| Internal standard                                                  | 1.5 ppb In, 5 % HCl (ultra-pure)                                           |
| Scan type                                                          | E-scan                                                                     |
| Elements monitored in low resolution ( $m/\Delta m \sim 400$ )     | Pb                                                                         |
| Elements monitored in medium resolution ( $m/\Delta m \sim 4000$ ) | Na, Mg, Al, Ti, V, Cr, Mn, Fe                                              |
| Elements monitored in high resolution ( $m/\Delta m \sim 4000$ )   | K, As                                                                      |
